# Supplementary material for: Psychometric Properties of the German Version of the Quality of Life after Brain Injury Scale for Kids and Adolescents (QOLIBRI-KID/ADO) Using Item Response Theory Framework: Results from the Pilot Study
Source: MDPI journal article supplement (doi:10.3390/jcm12113716), 2023-05-27

## A: Cognition

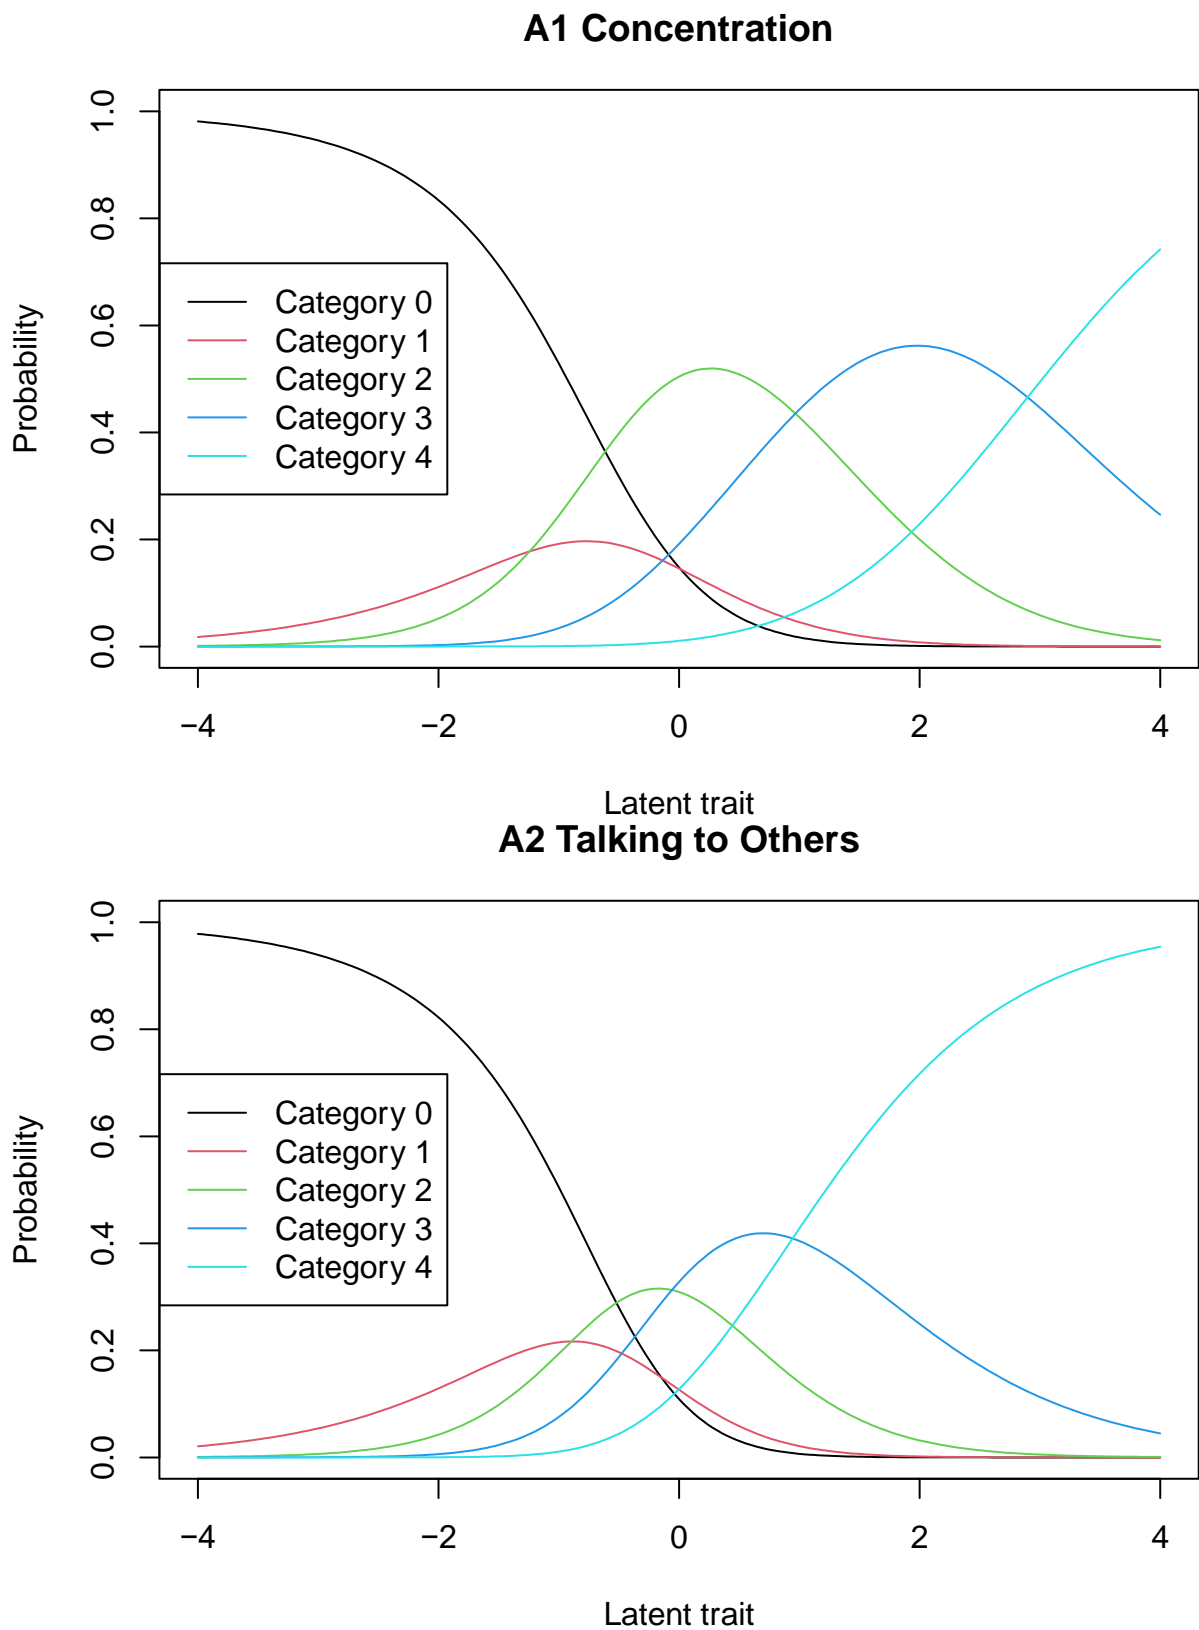

### A3 Remembering

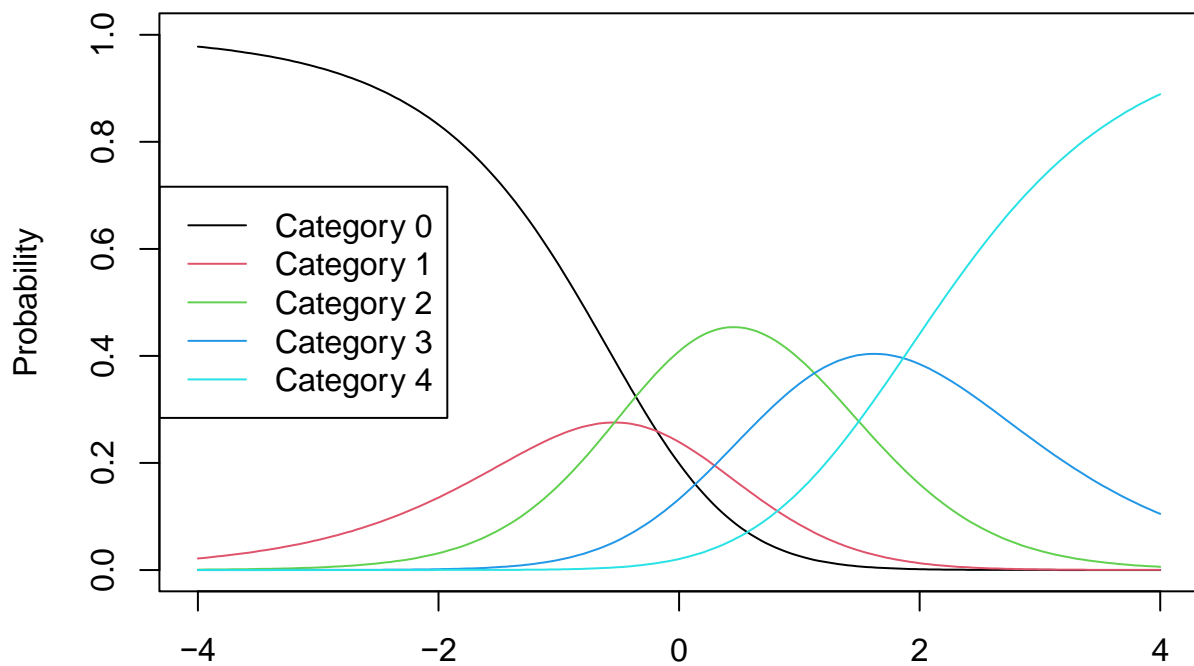

### A4 Planning

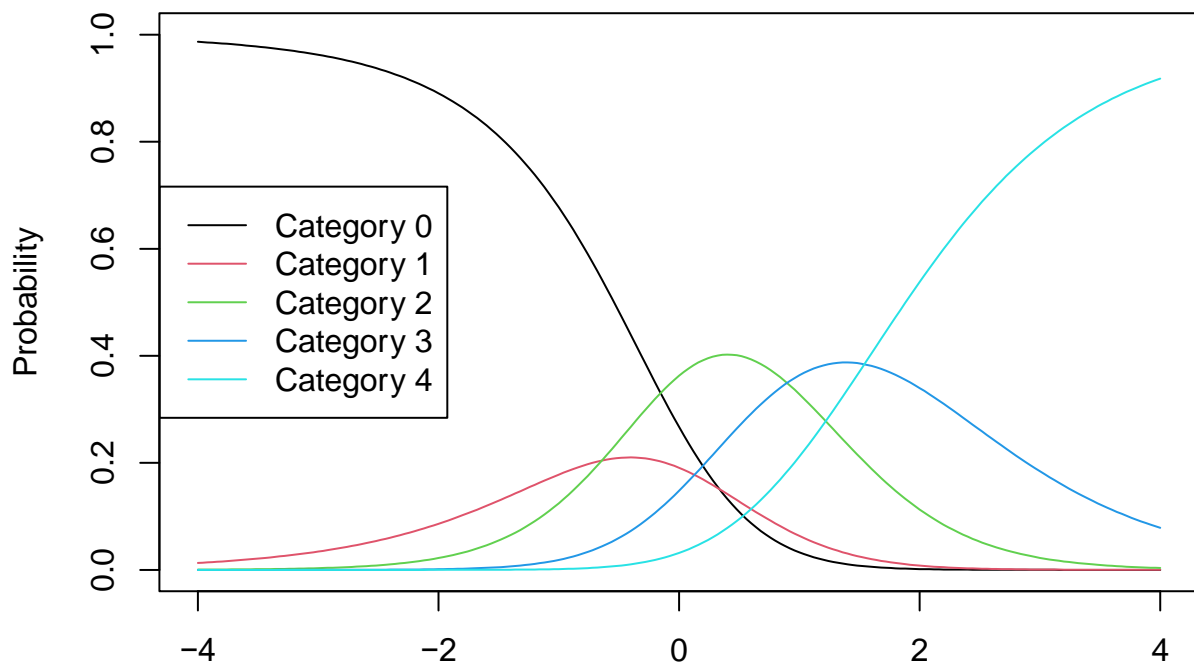

### A5 Decision Between Two

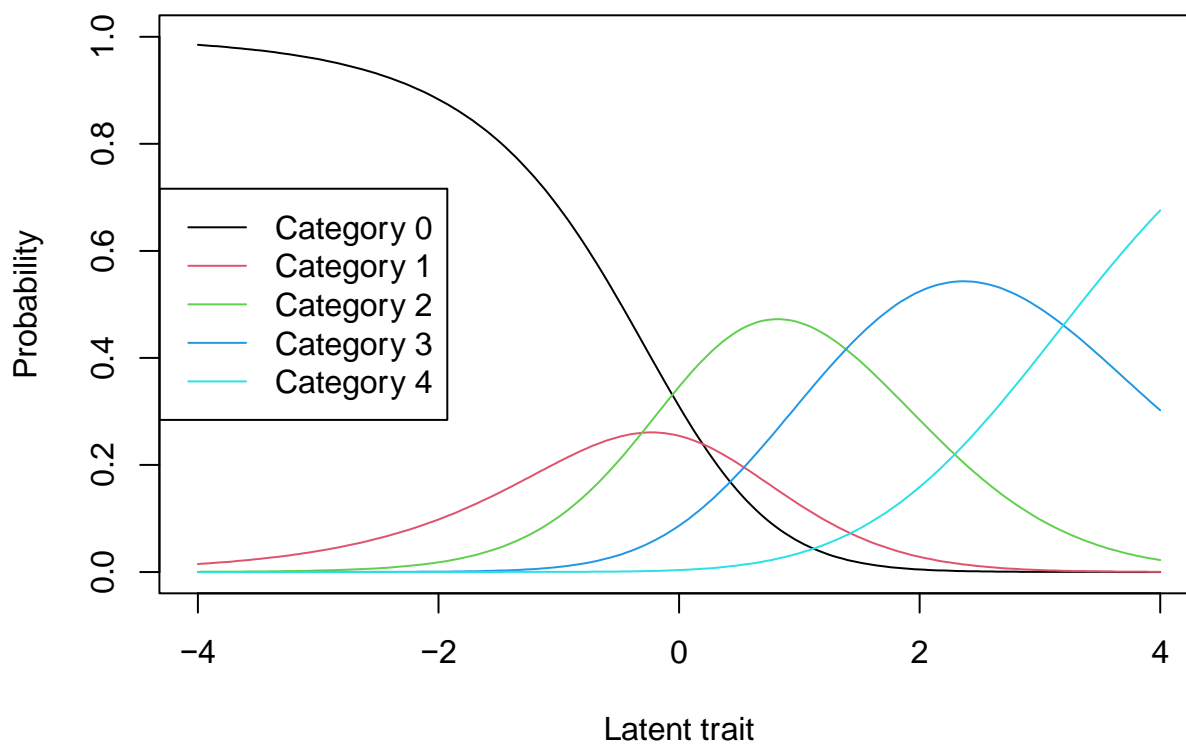

### A6 Orientation

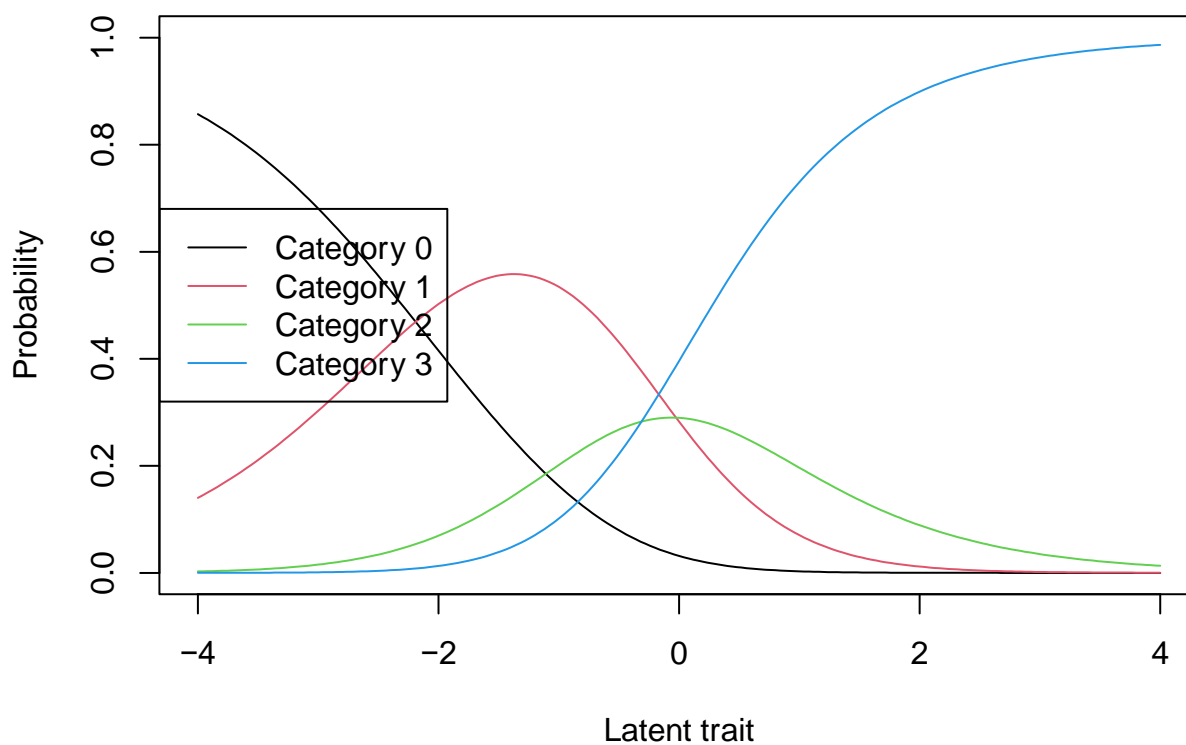

### A7 Thinking Speed

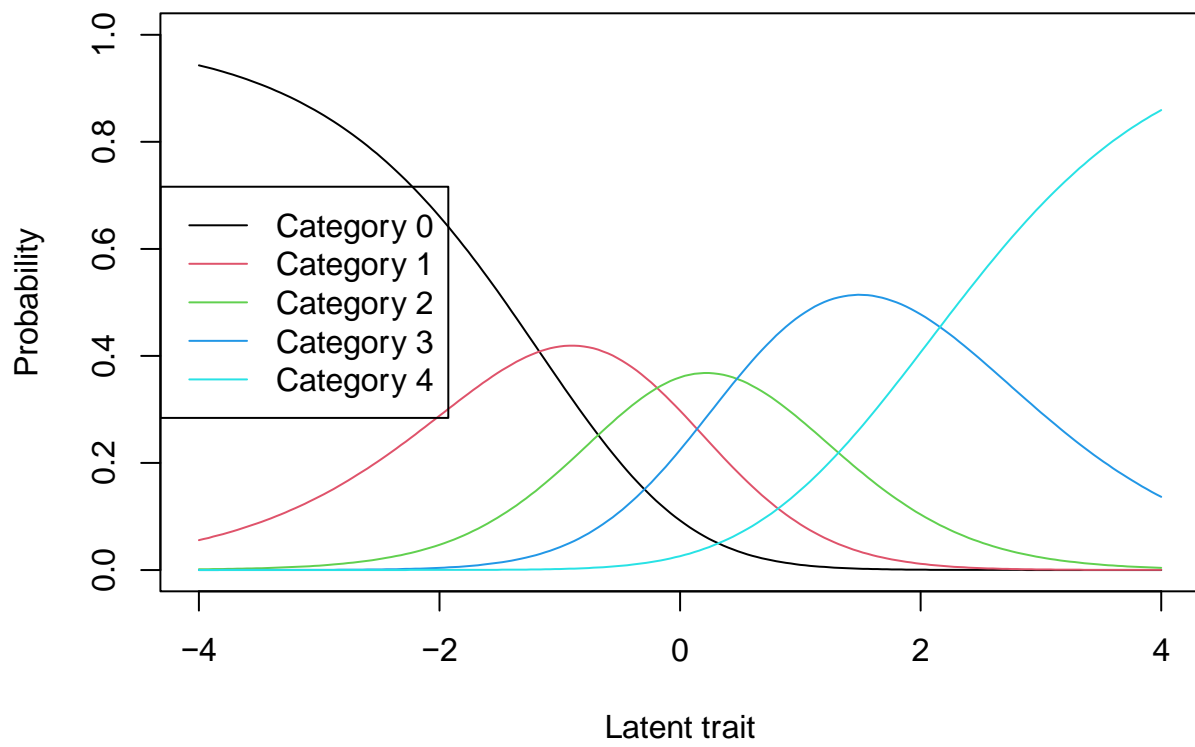

## B: Self

### B1 Energy

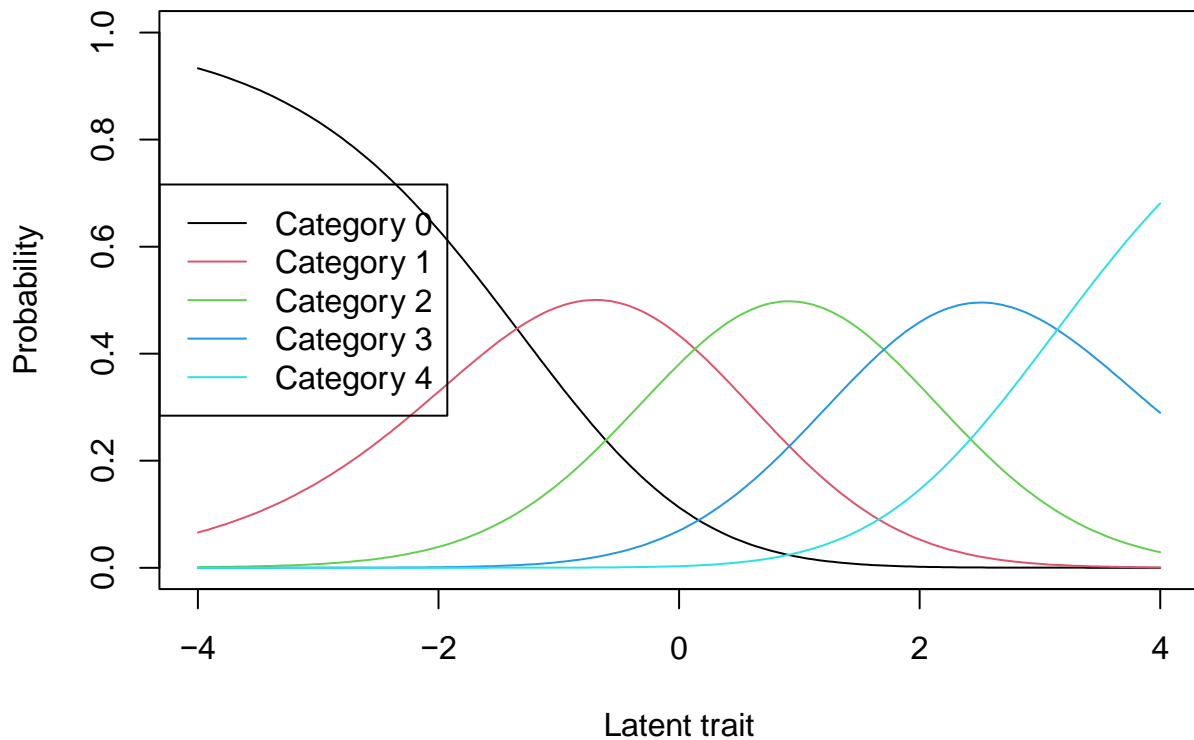

### B2 Accomplishment

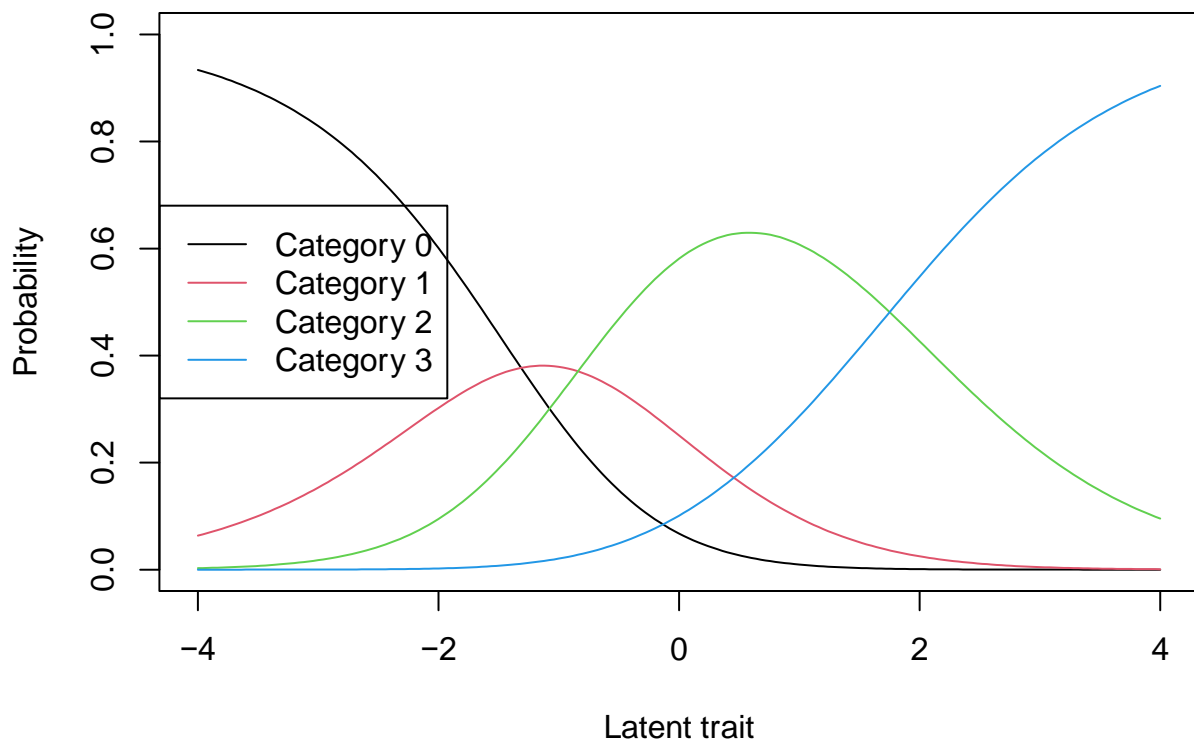

### B3 Appearance

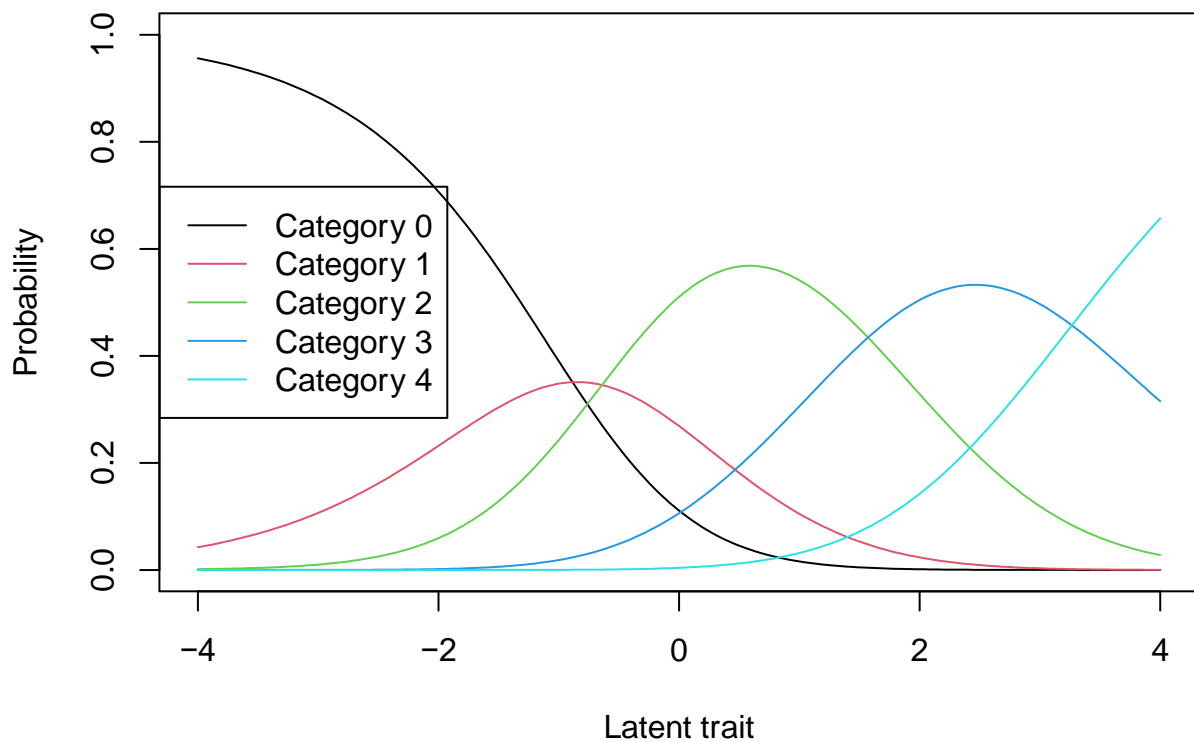

### B4 Self-Esteem

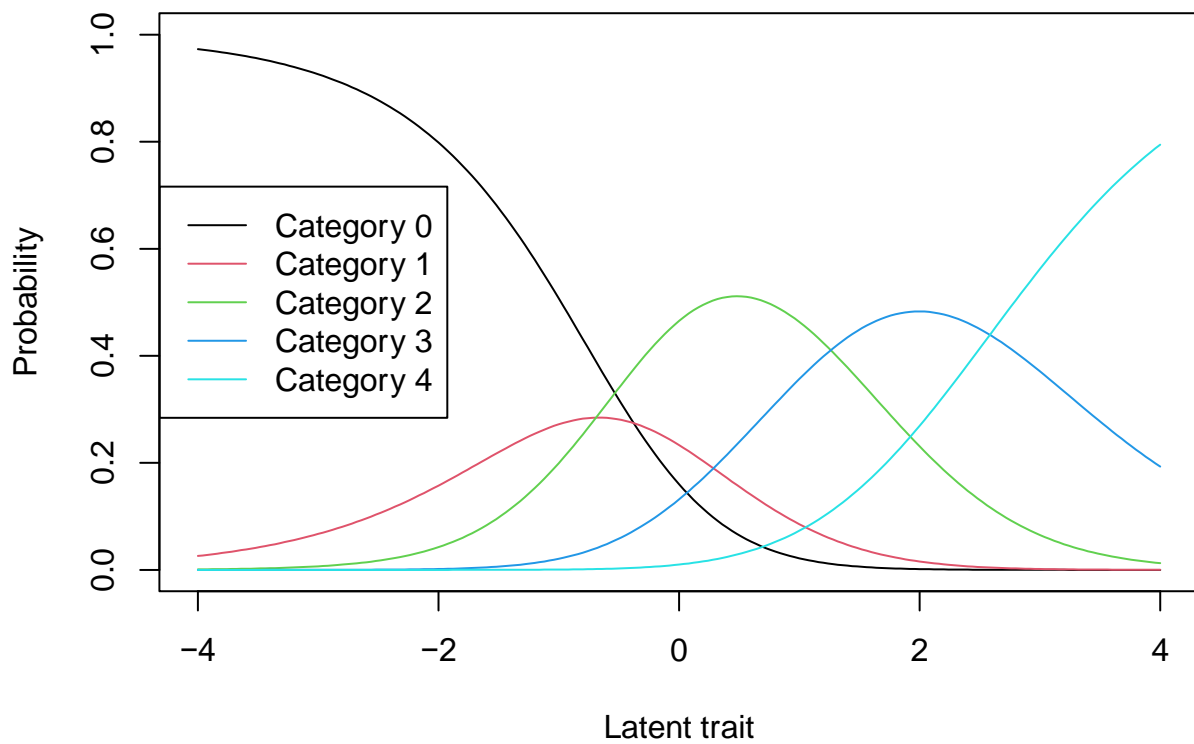

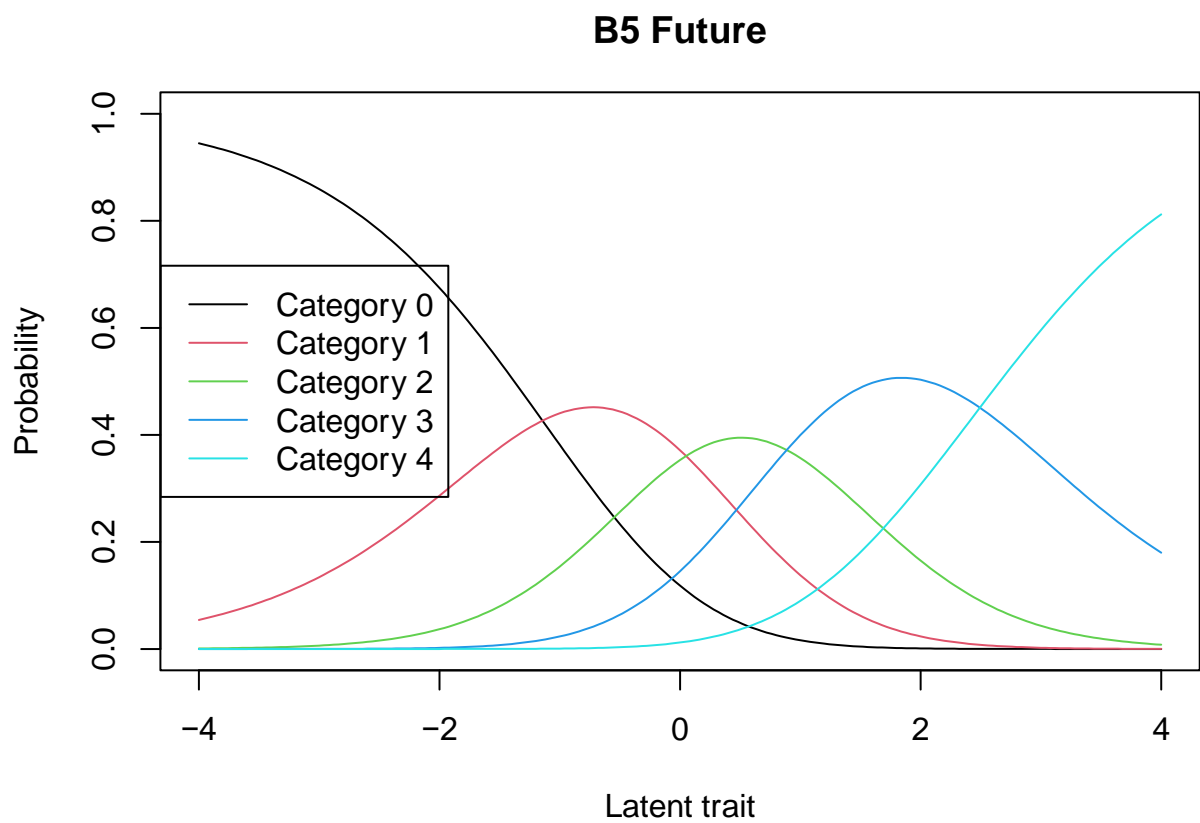

## C: Autonomy and Daily Life

**C1 Daily Independence**

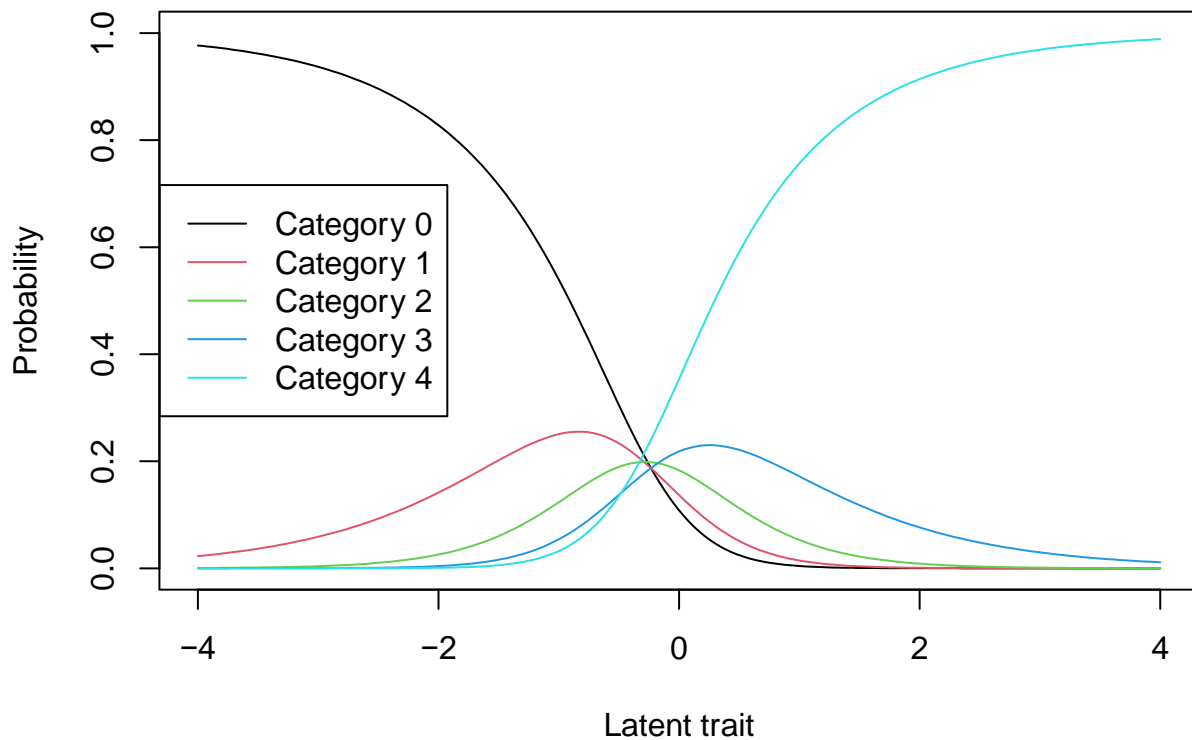

**C2 Getting out and about**

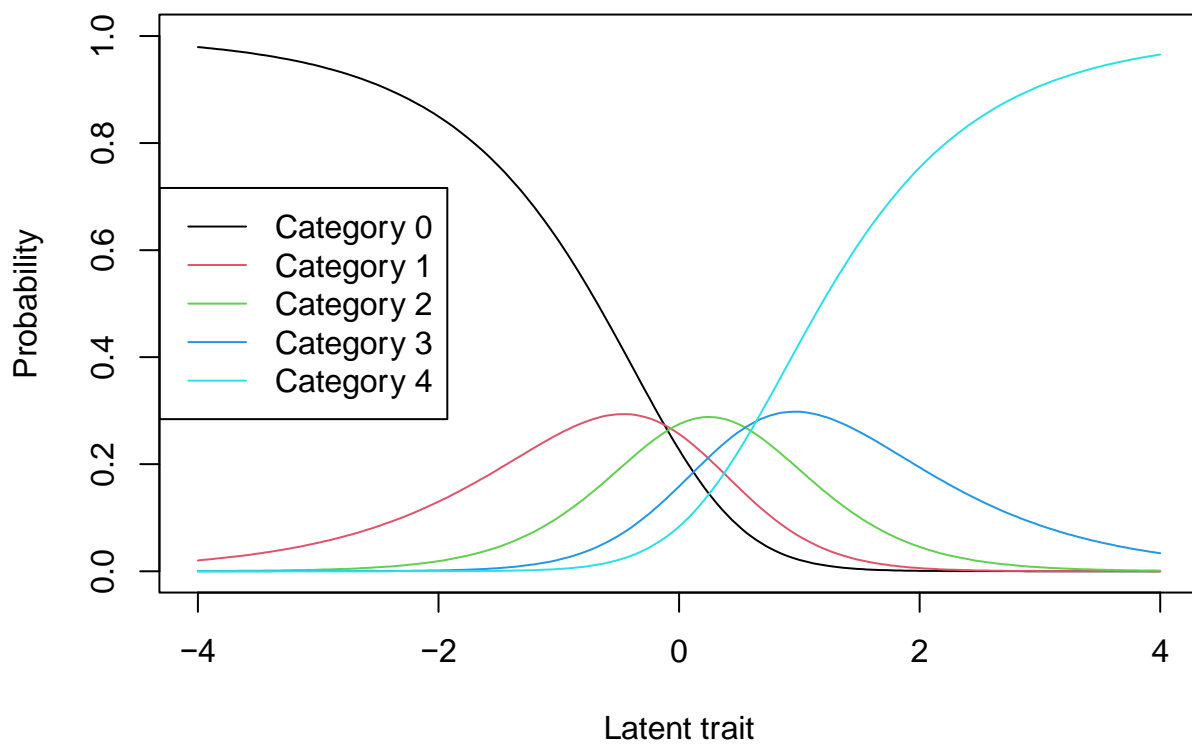



### C3 Manage at School

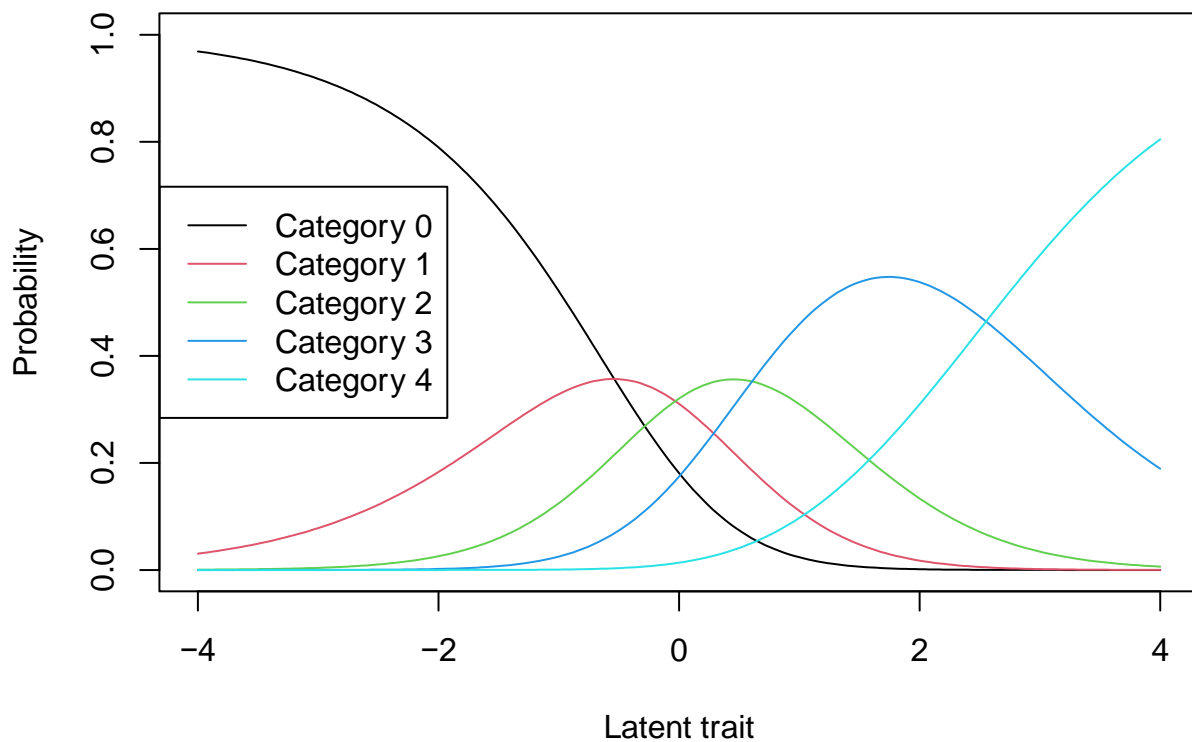

### C4 Social Activities

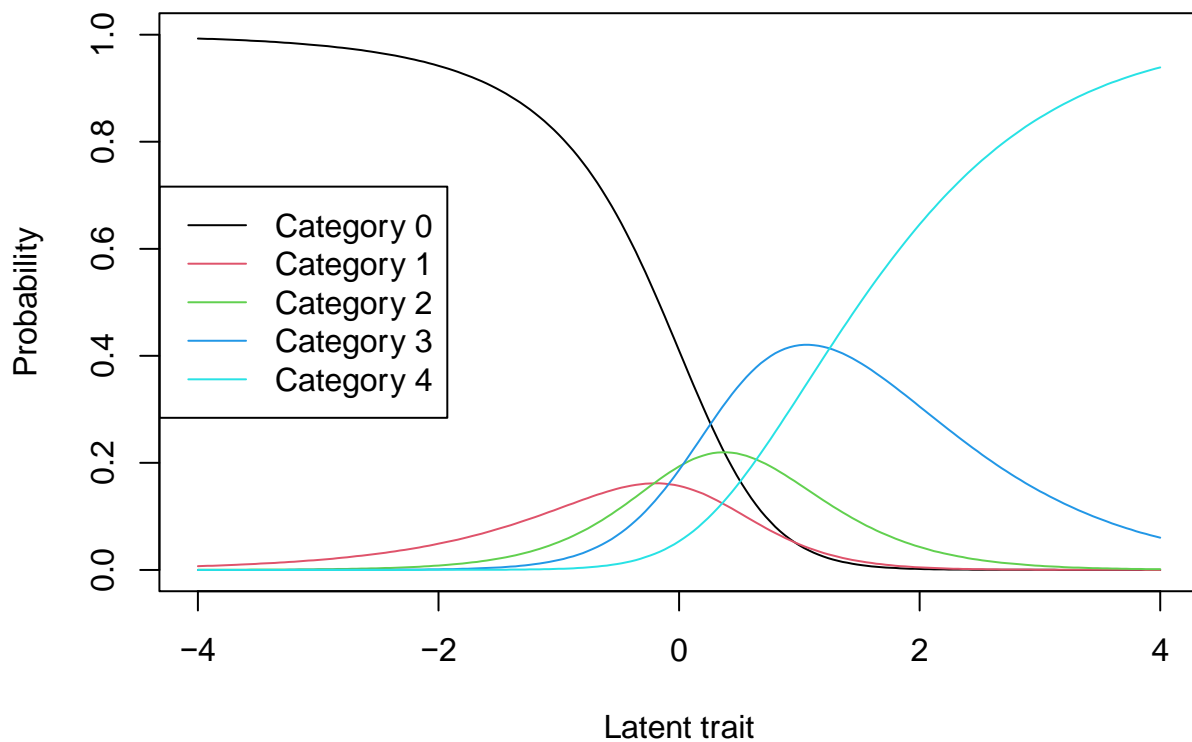

### C5 Decision Making

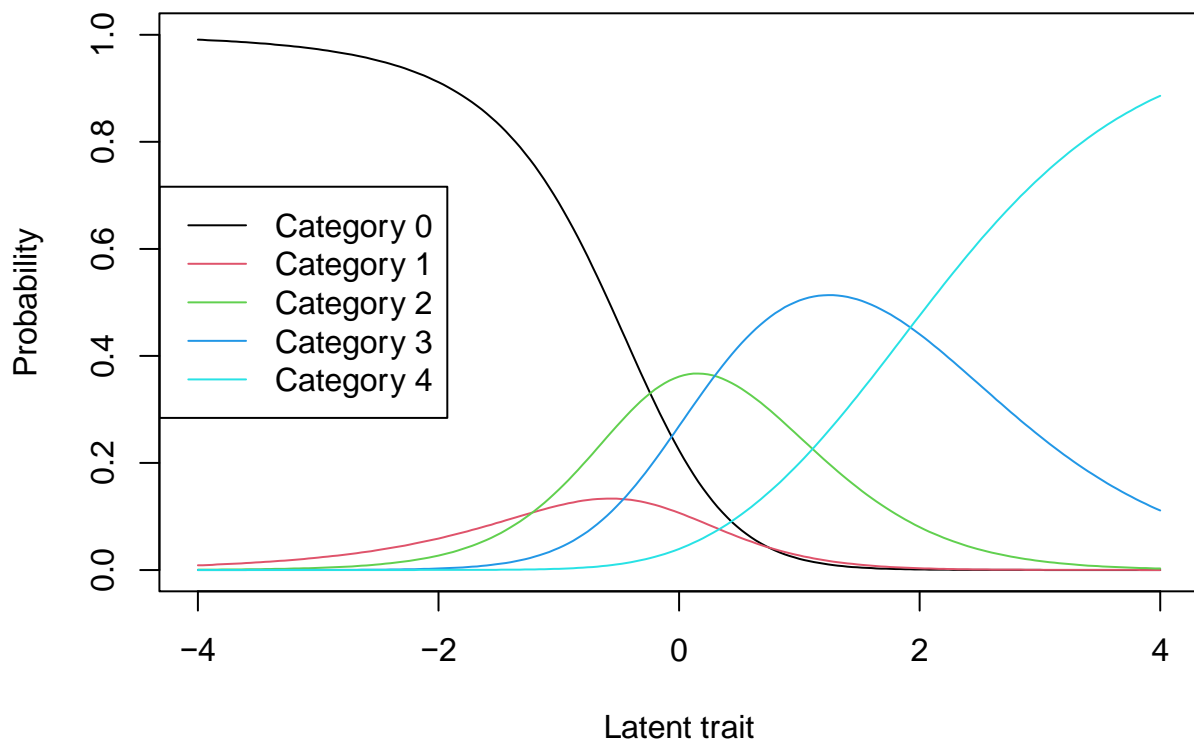

### C6 Support from Others

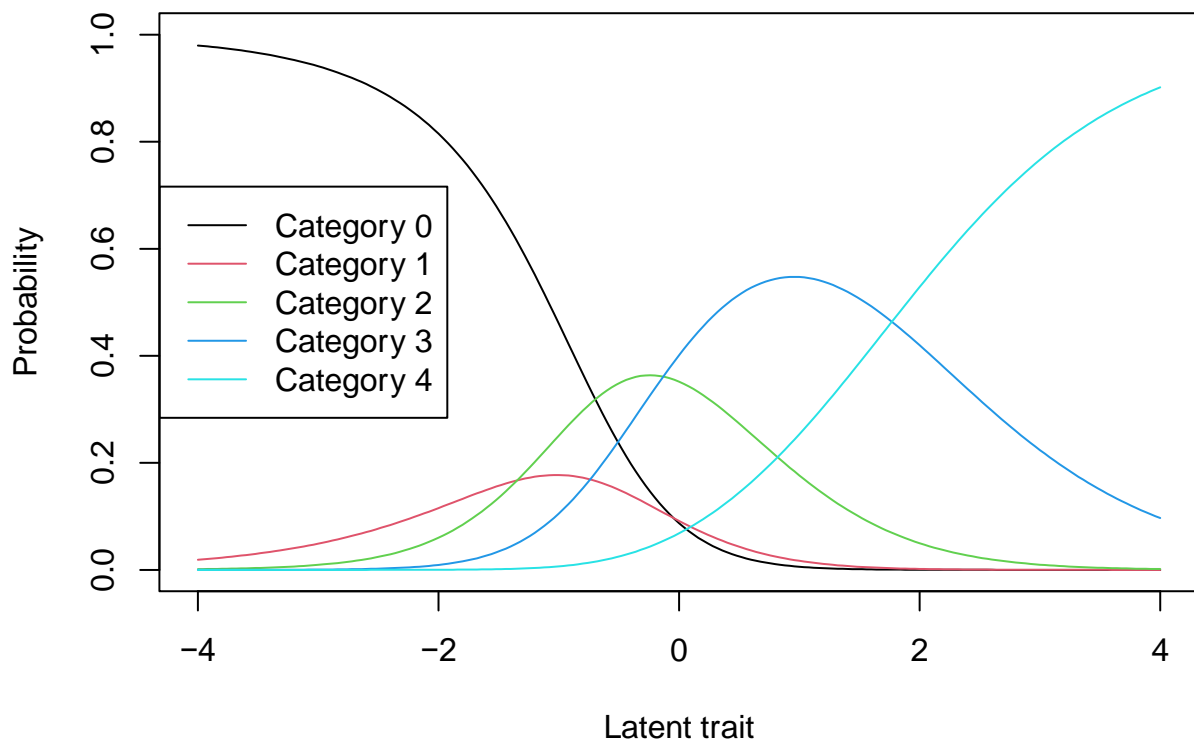

### C7 Ability to Move

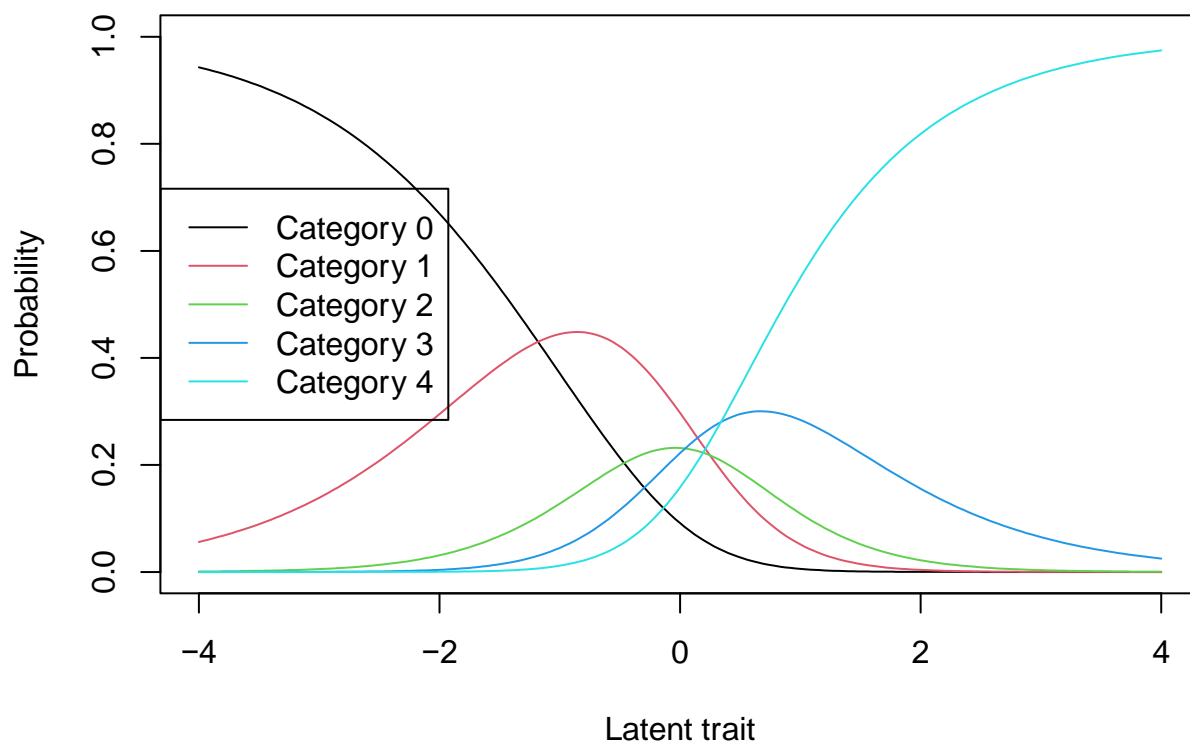

## D: Social

### D1 Open up to Others

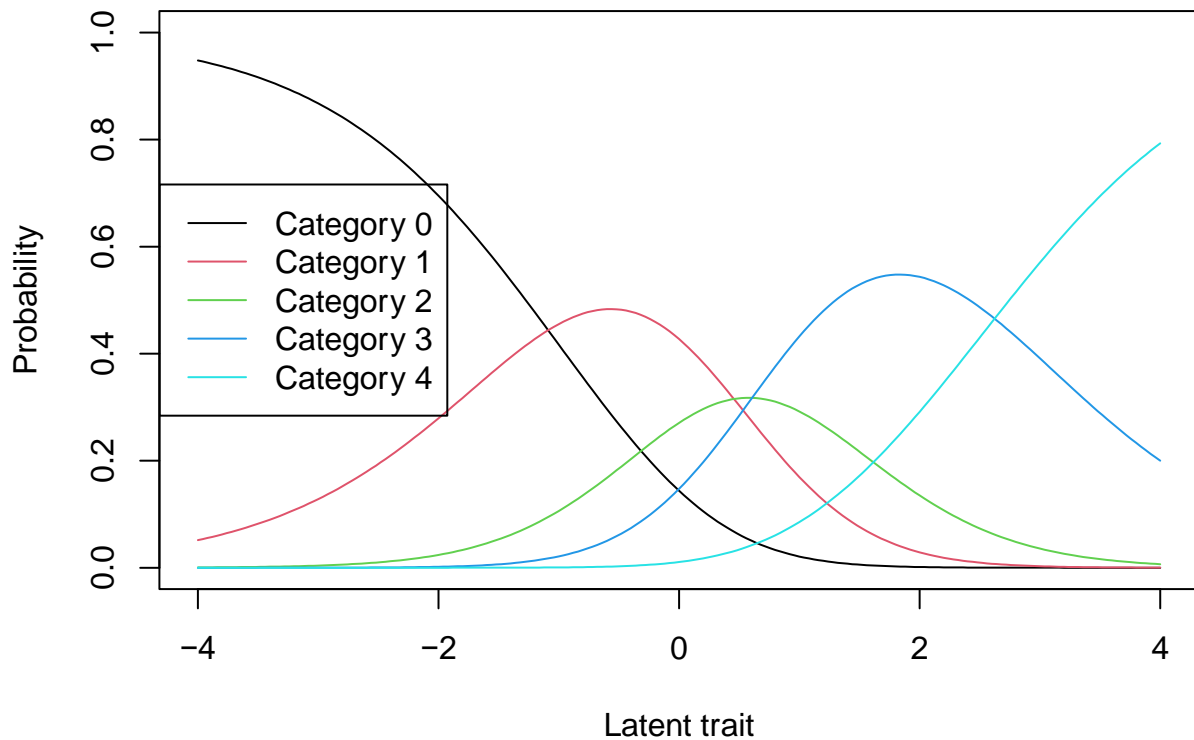

### D2 Family Relationship

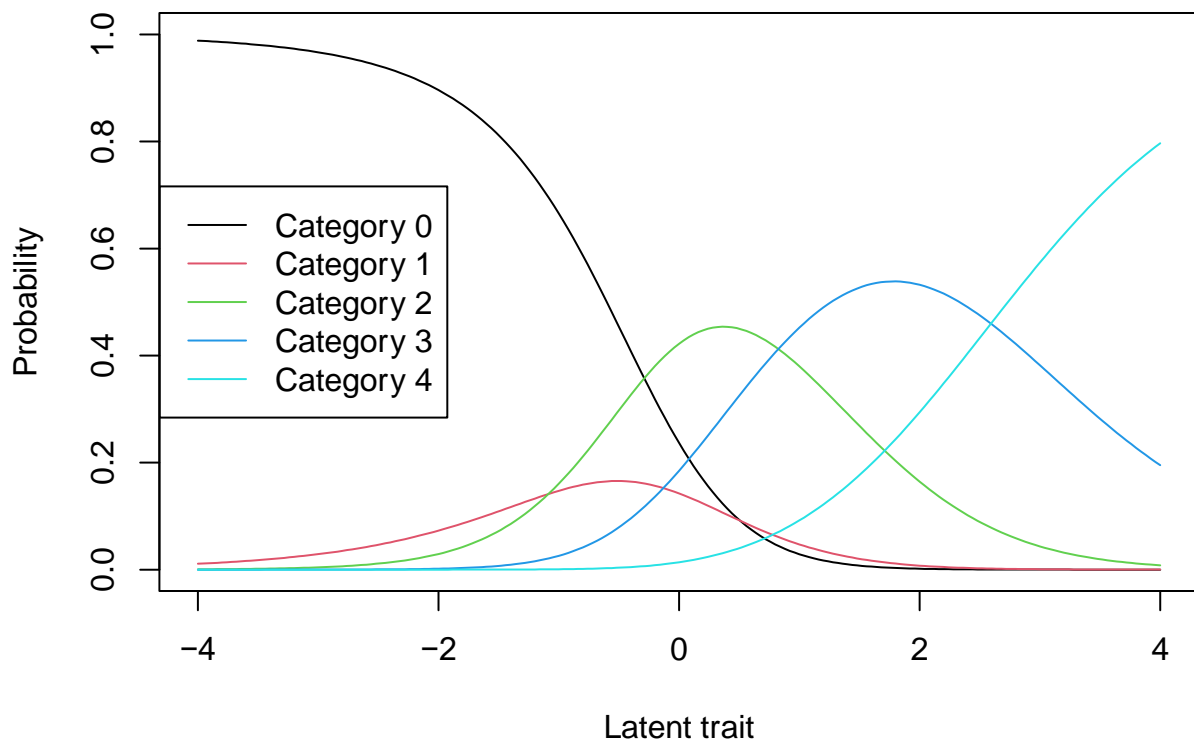

### D3 Relationship with Friends

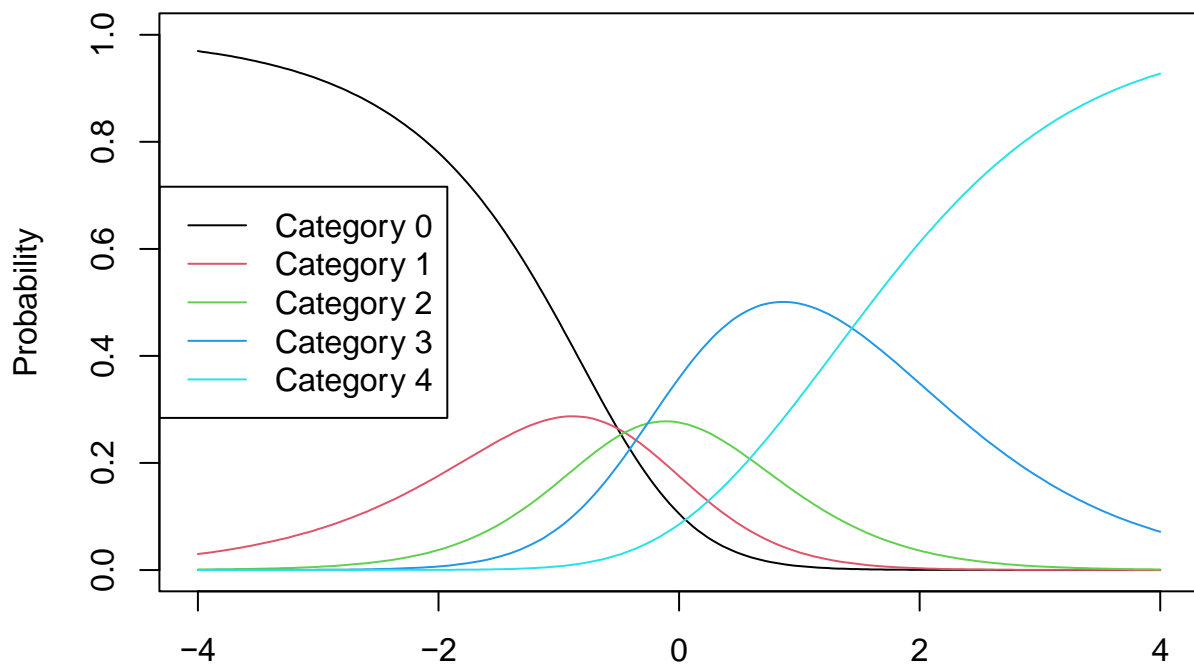

### D4 Friendships

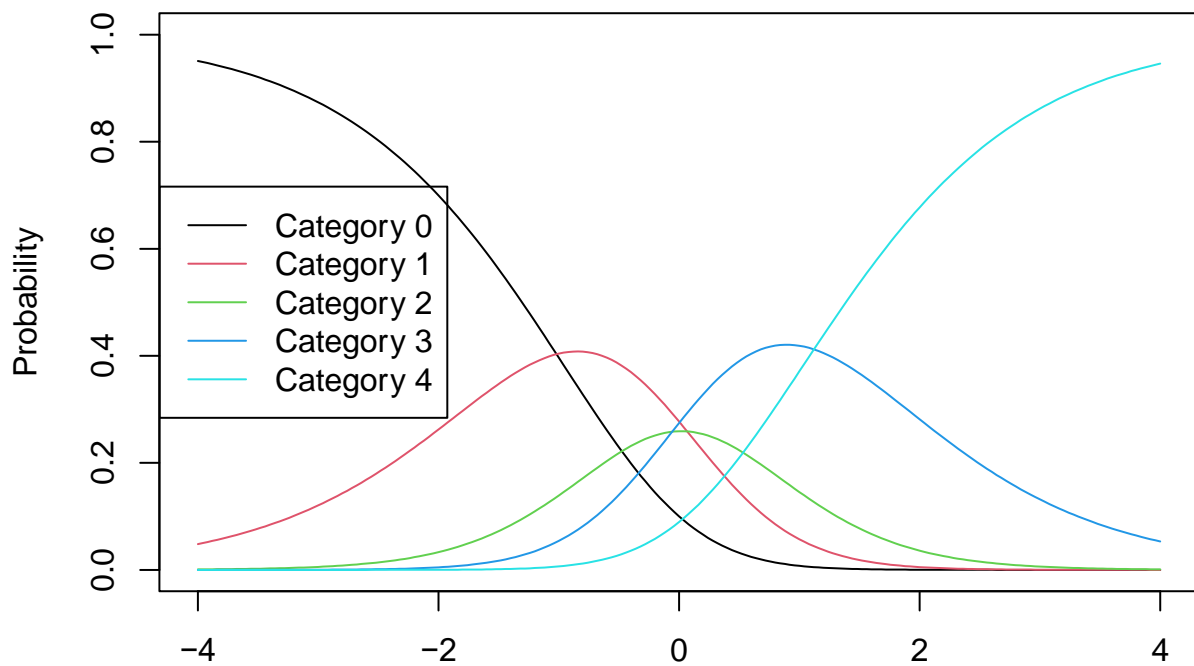

### D5 Attitudes of Others

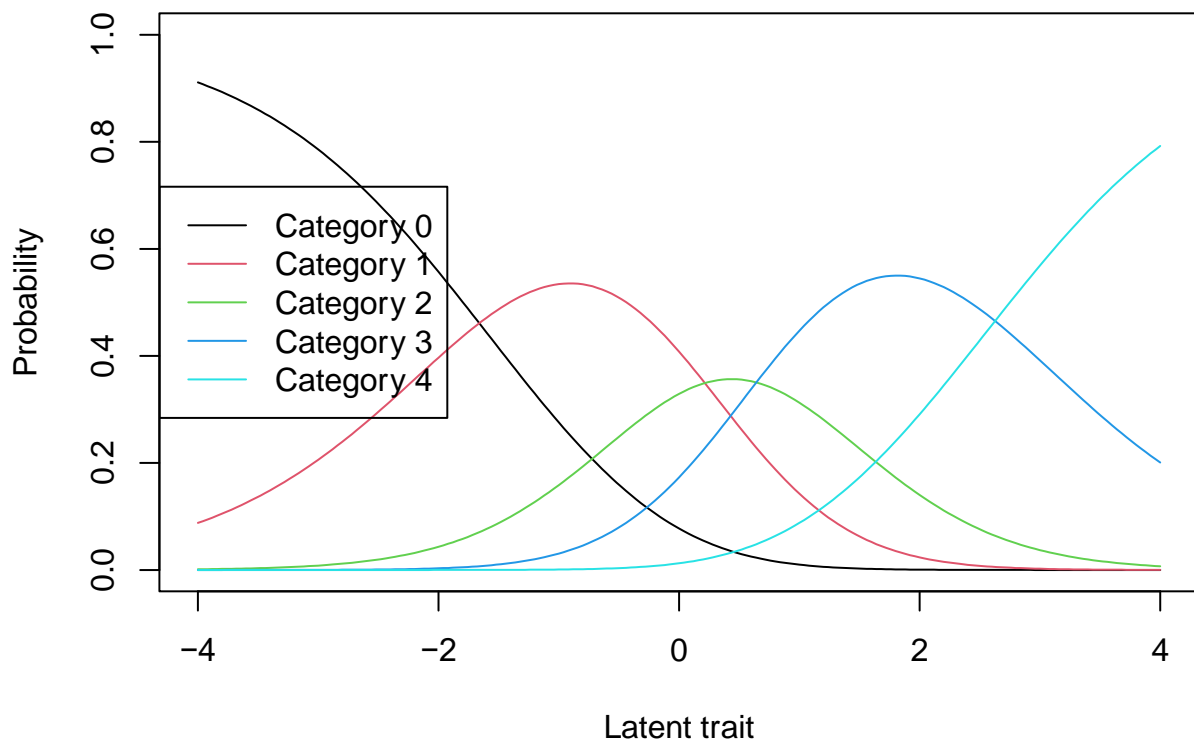

### D6 Demands from Others

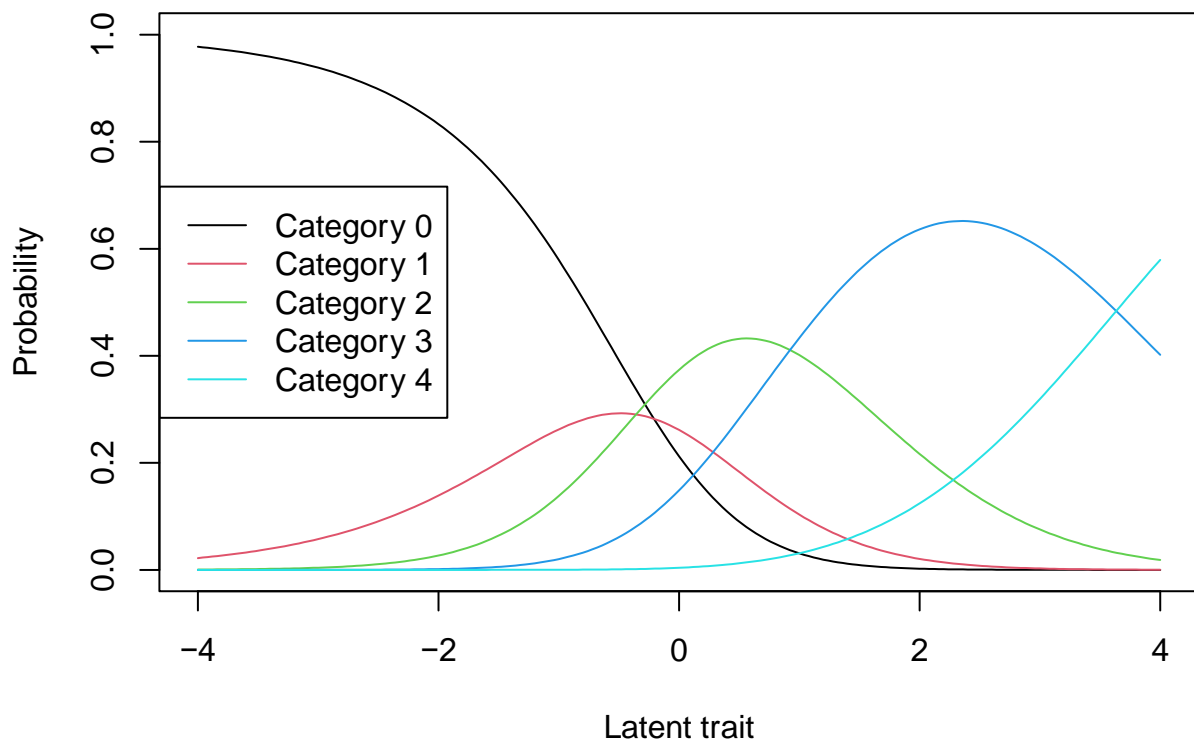

## E: Emotions

### E1 Loneliness

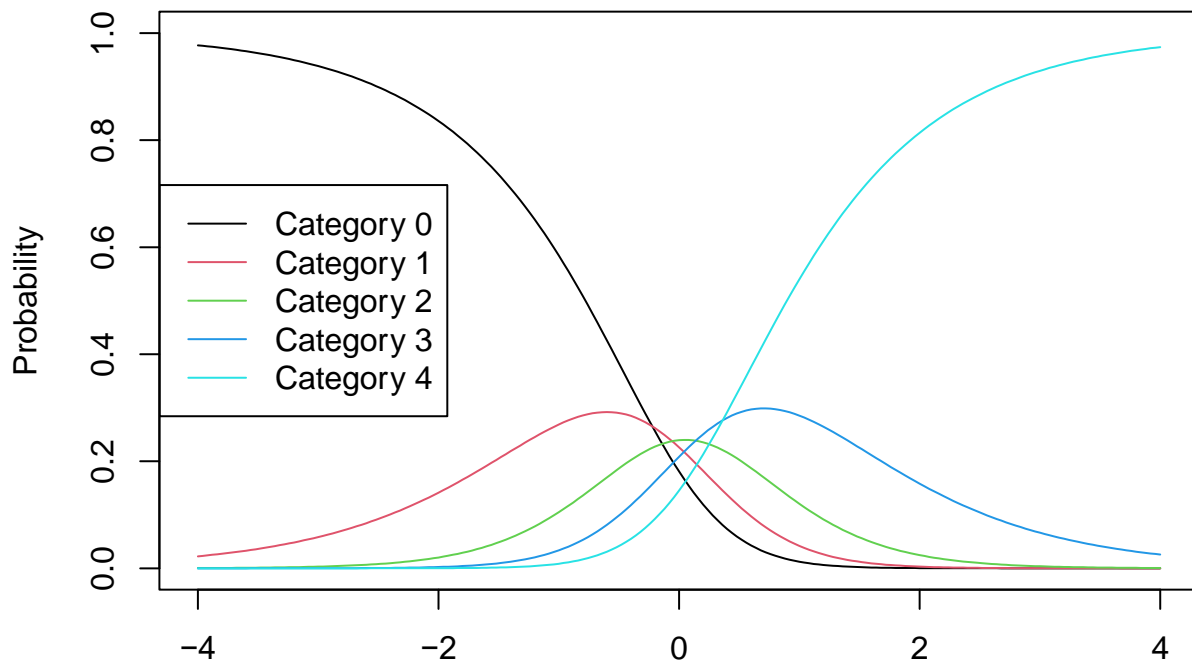

### E2 Anxiety

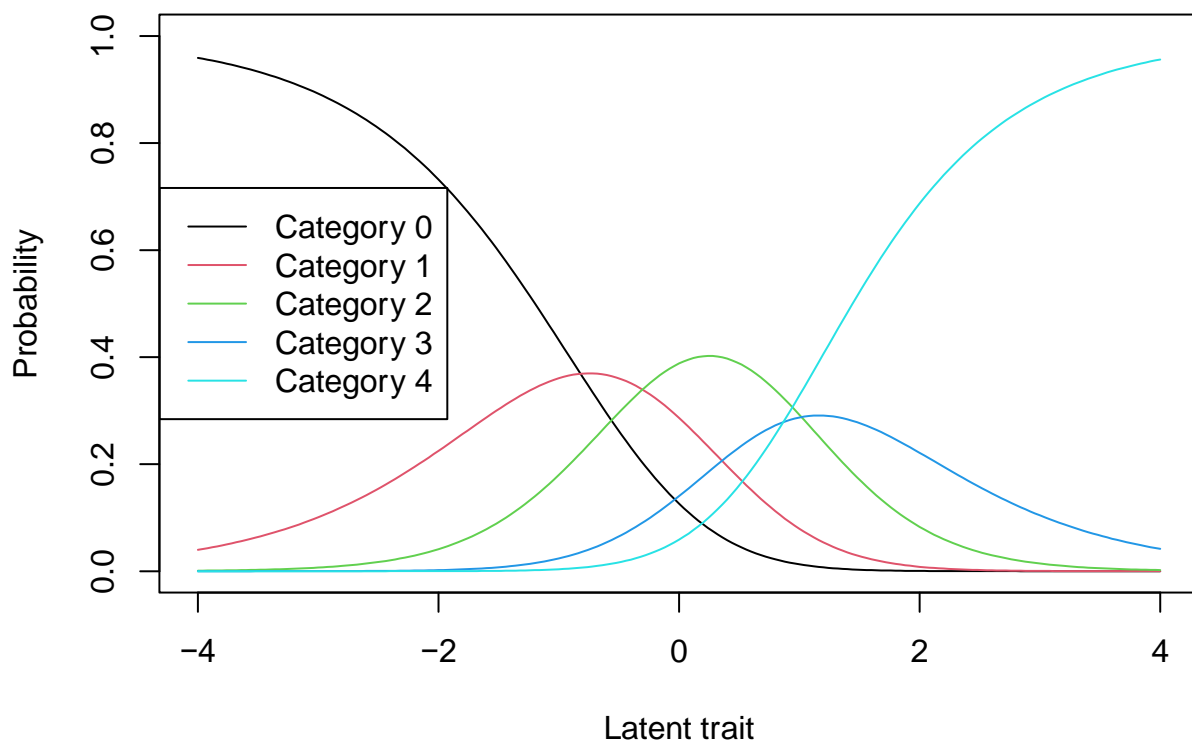

### E3 Sadness

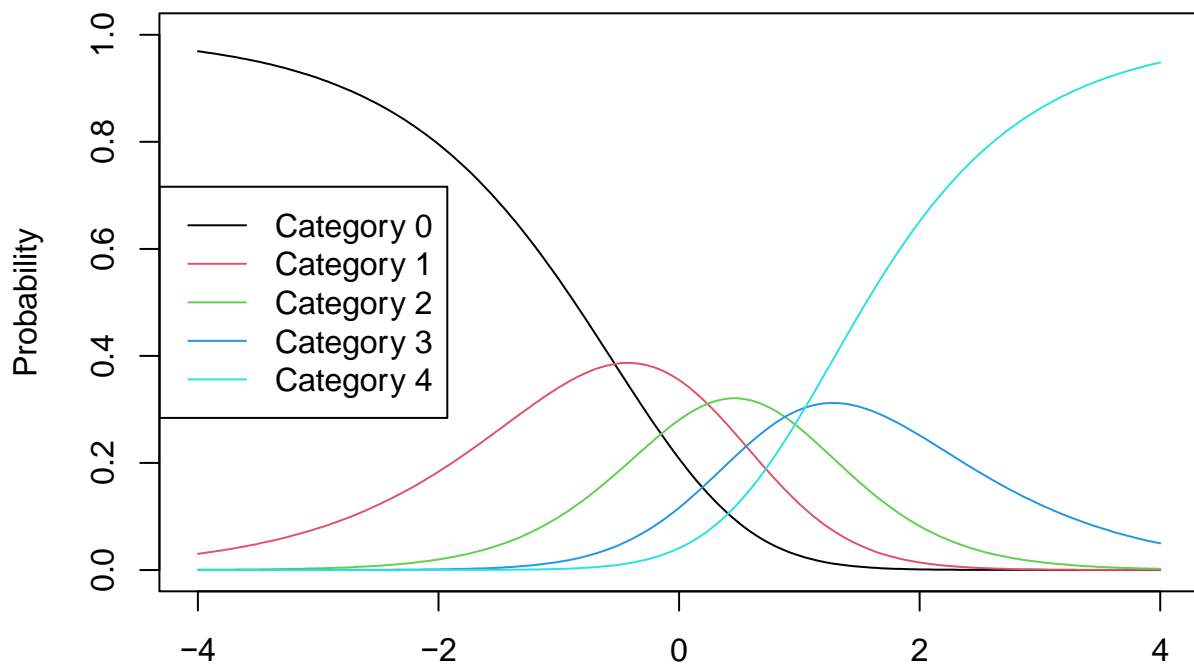

### E4 Anger

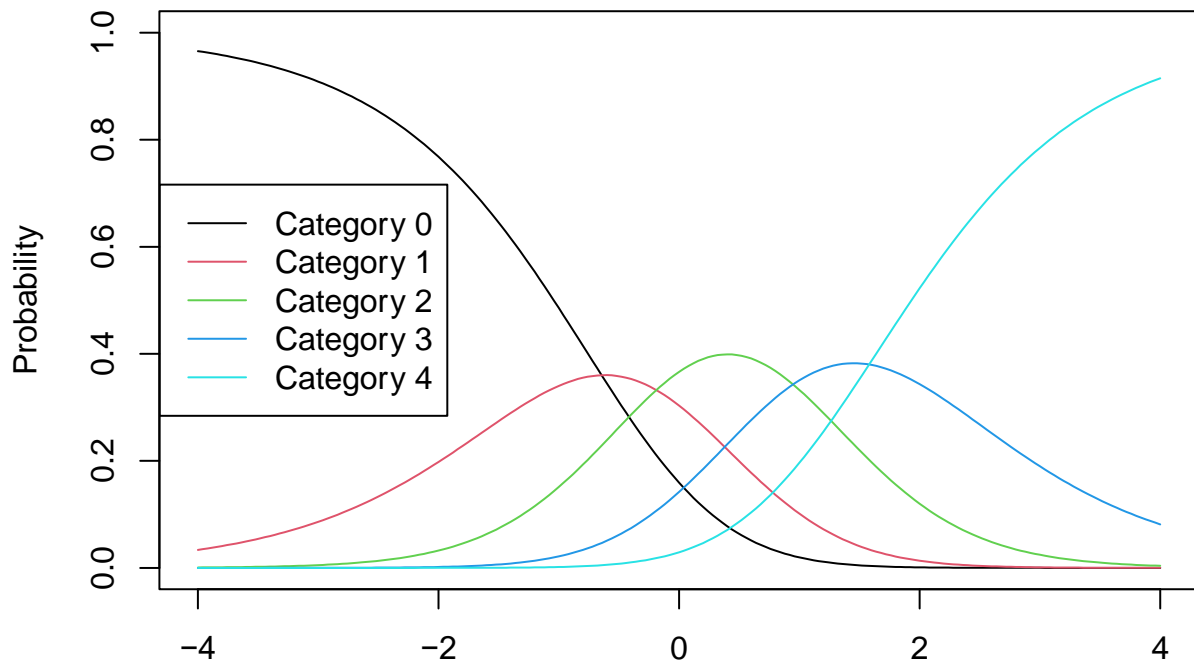



## F: Physical

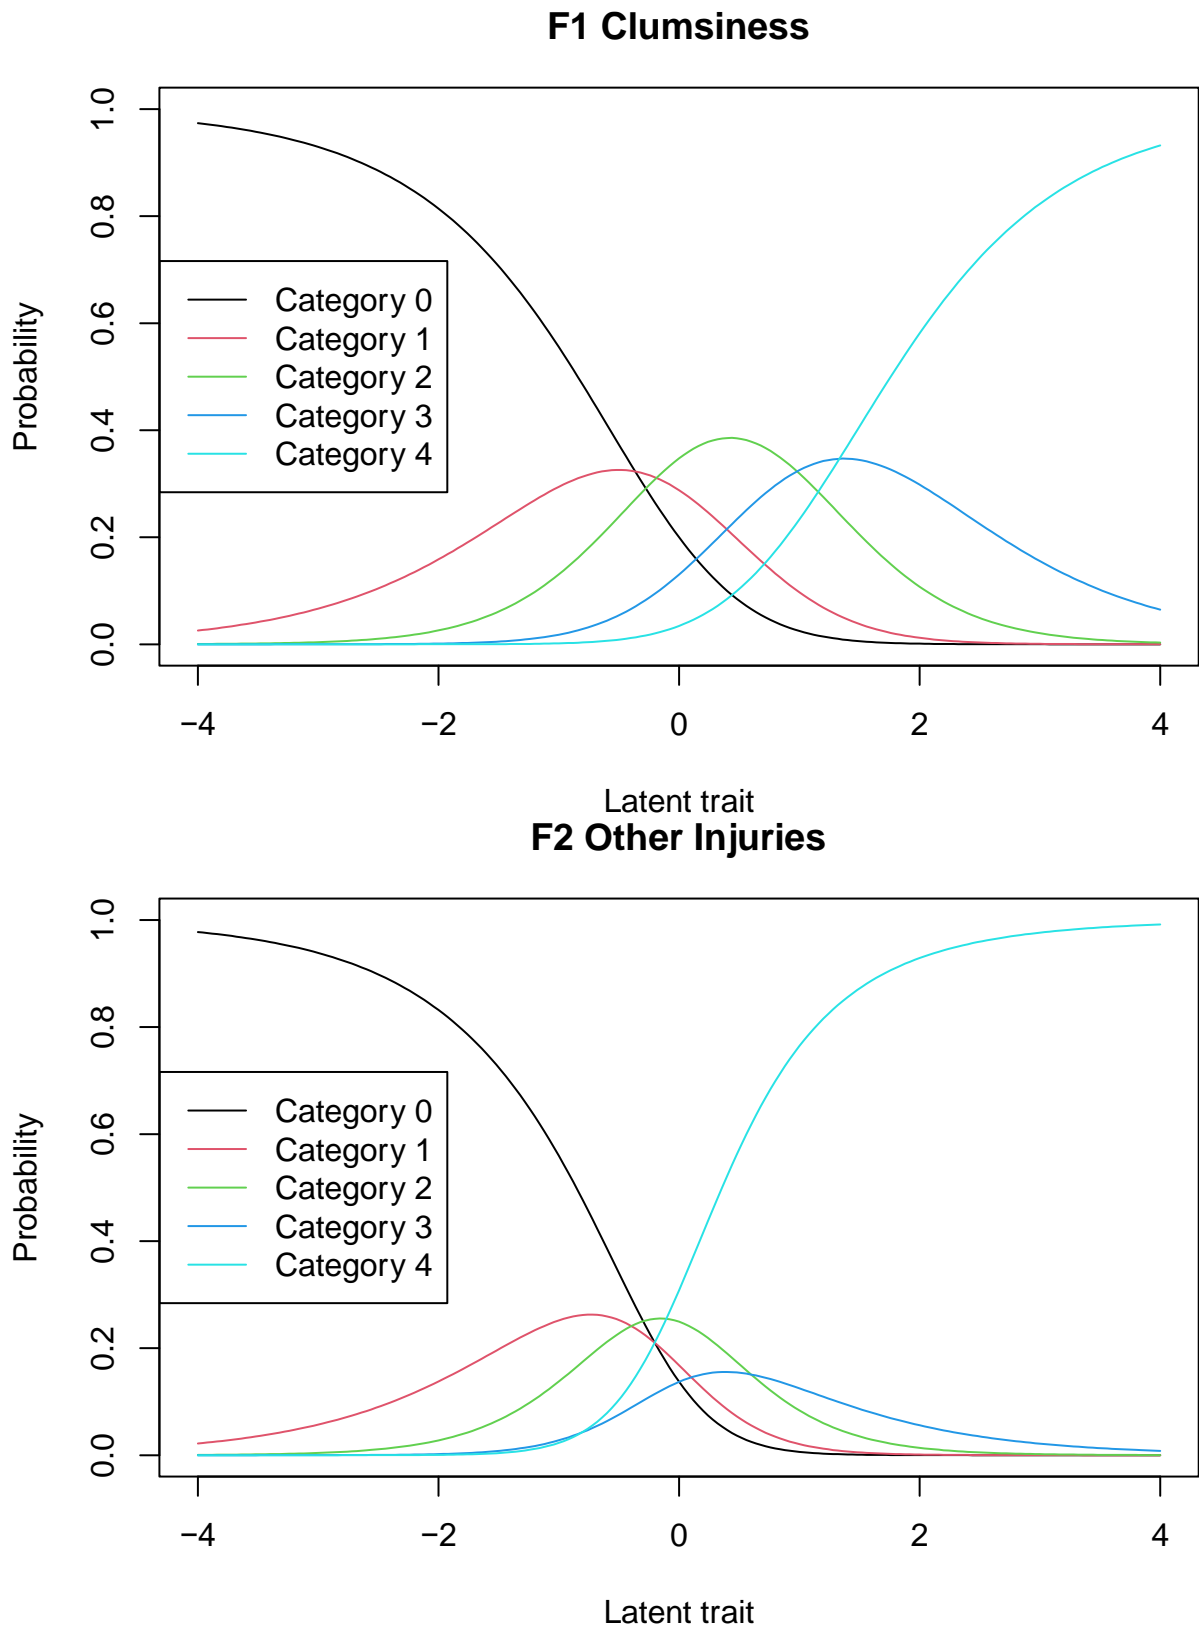

### F3 Headaches

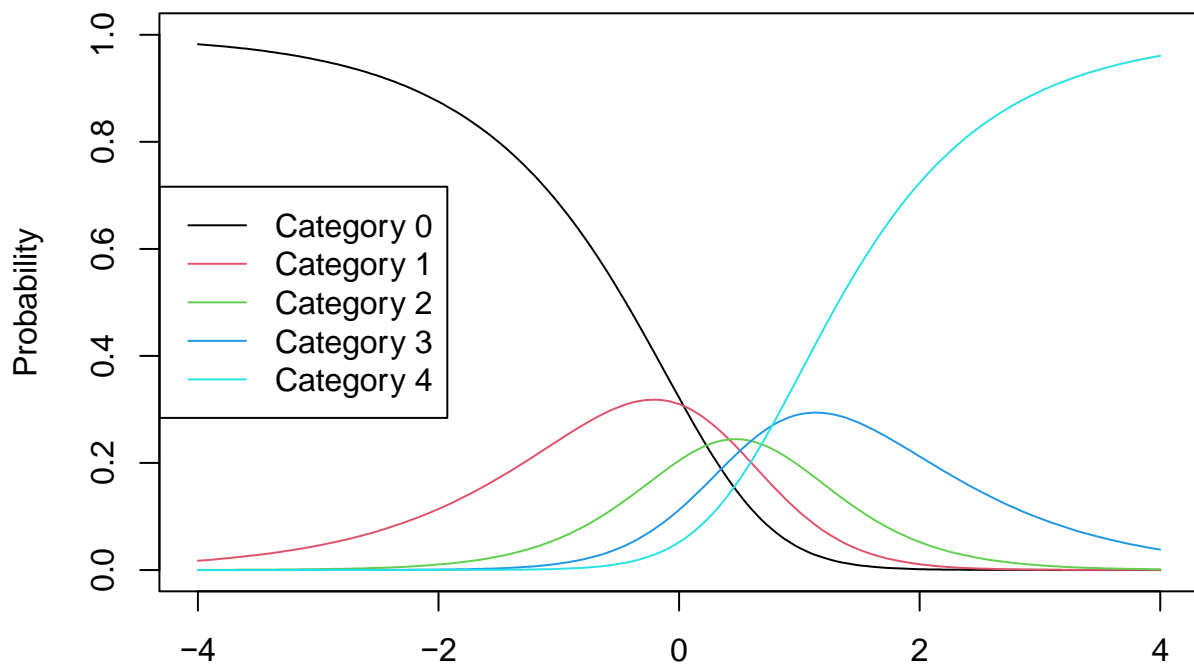

### F4 Pain

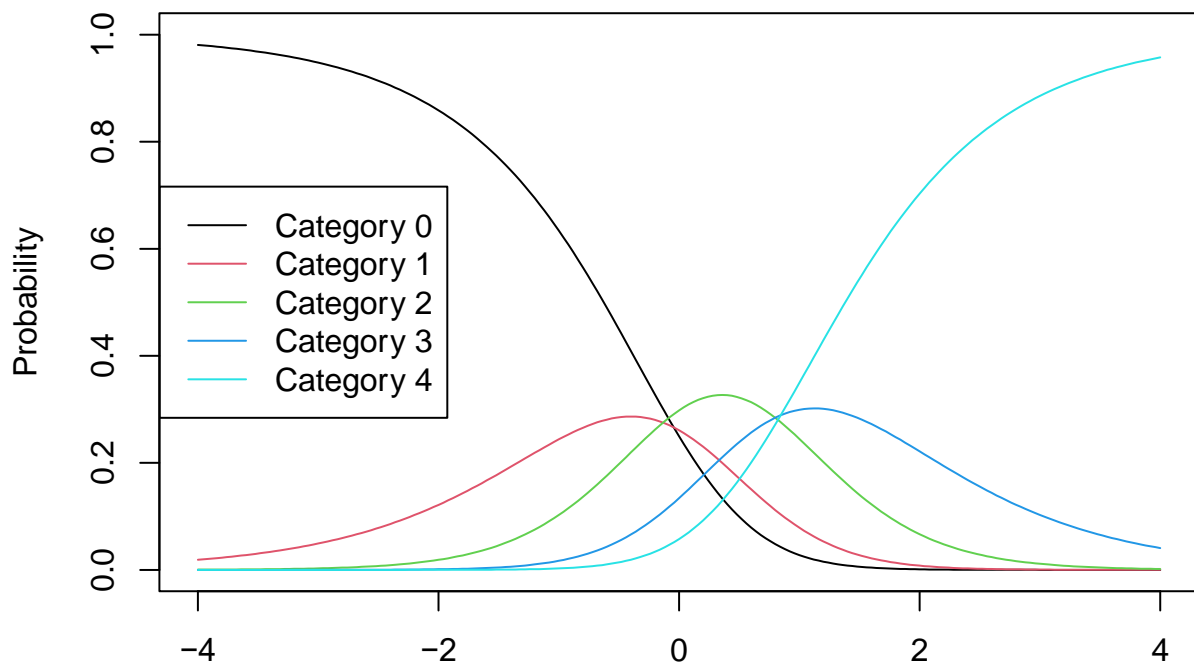

### F5 Seeing/Hearing

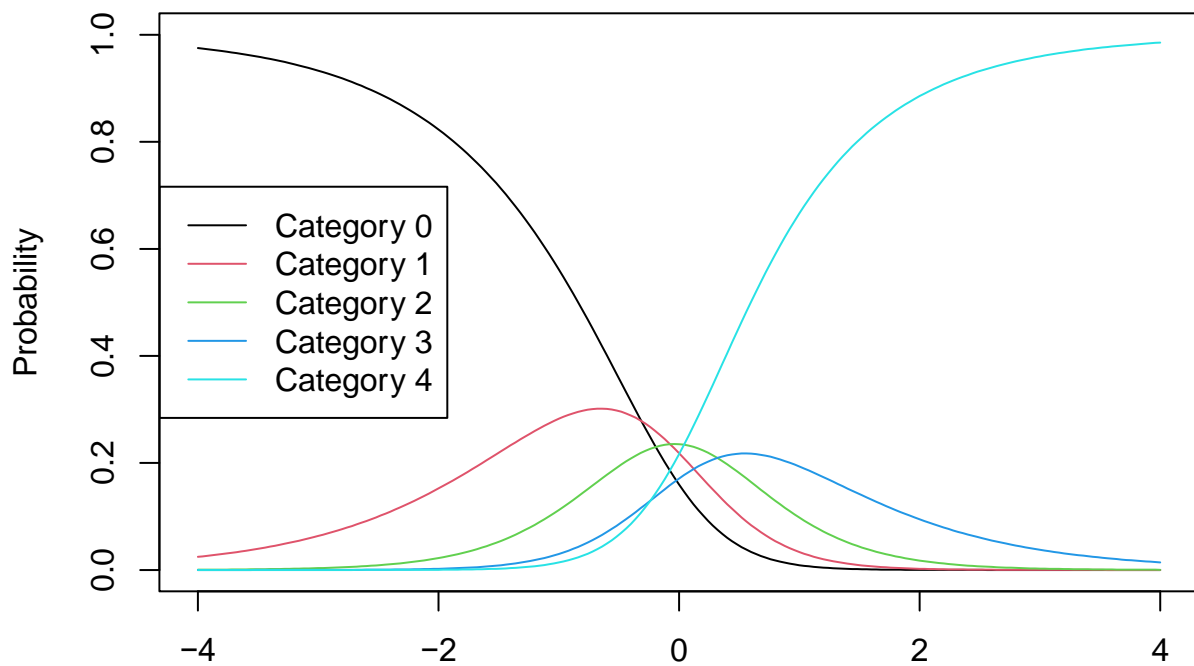

### F6 TBI Effects

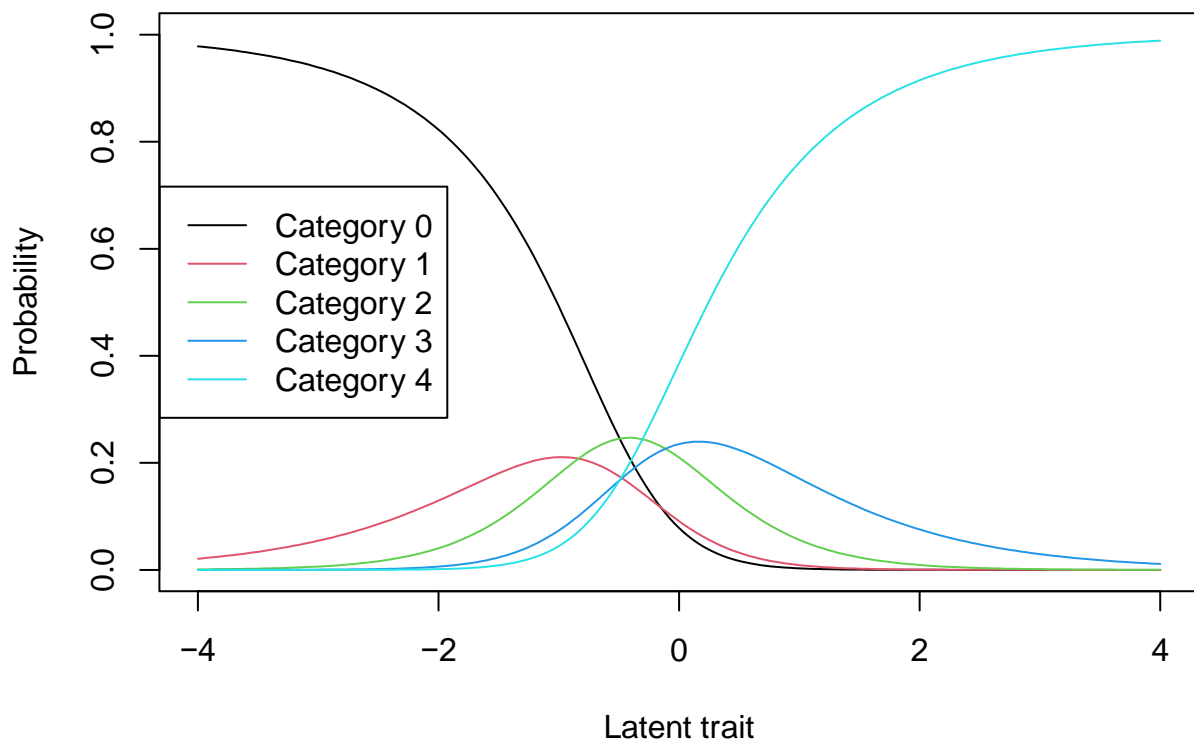

Supplement: s1 [file s1]
